# Supplementary material for: Trajectory-Based Dust Evolution in Disks: First Results from the RAPID simulation code
Source: Research Square preprint supplement (doi:10.21203/rs.3.rs-7467346/v1), 2025-09-16
Supplement: Supplementary file 1 [file 591b591940f0df3594579a40.pdf]

# Trajectory-Based Dust Evolution in Disks: First Results from the RAPID simulation code

Dóra Tarczay-Nehéz<sup>1,2\*</sup>

<sup>1\*</sup>Konkoly Observatory, HUN-REN CSFK, Konkoly Thege Miklós út 15-17, Budapest, 1121, Hungary.

<sup>2</sup>CSFK, MTA Centre of Excellence, Konkoly Thege Miklós út 15-17, Budapest, 1121, Hungary.

Corresponding author(s). E-mail(s): [tarczaynehez.dora@csfk.org](mailto:tarczaynehez.dora@csfk.org);

**Keywords:** keyword1, Keyword2, Keyword3, Keyword4

## 1 Supplementary Online Material for the Evolution of the Gas Component

Figures [S1/1](#) – [S1/9](#) present the time evolution of the gaseous component of the disk, i.e., the density contrast ( $\Sigma/\Sigma_{t=0}$ ) and the pressure gradient on a SymLog scale.

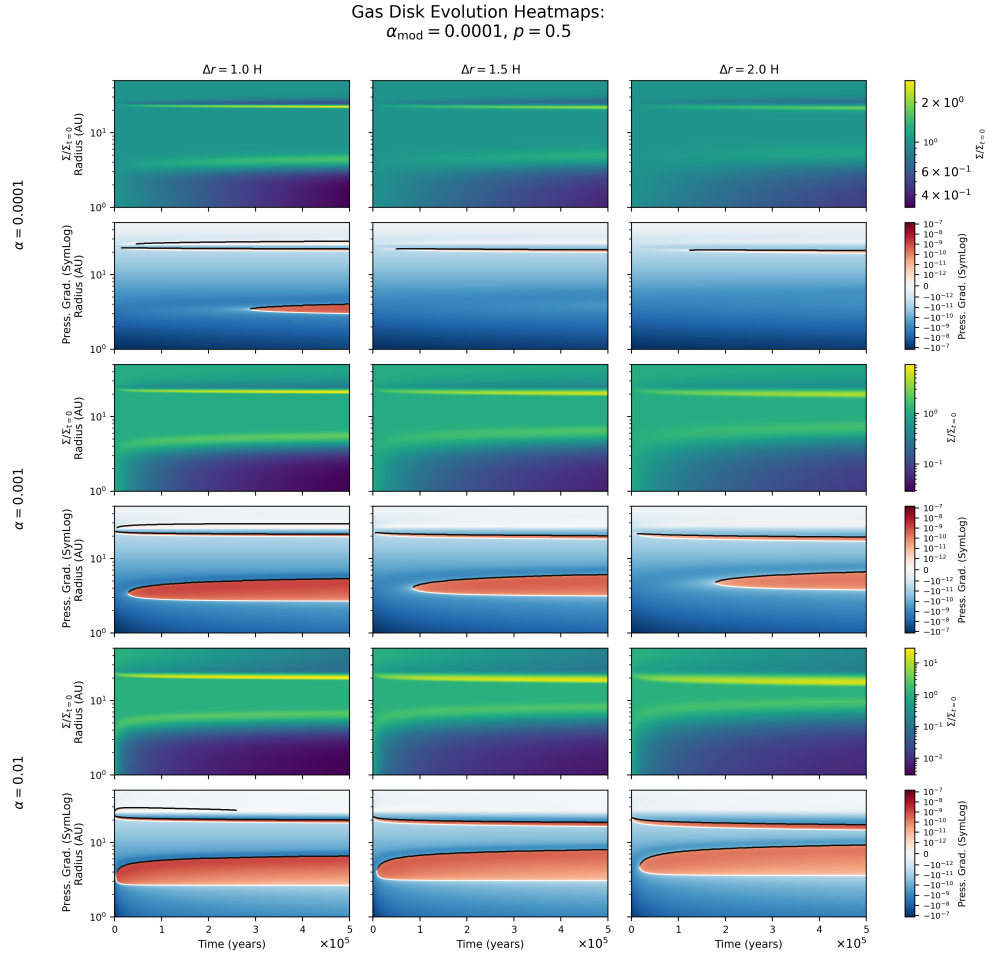

**Fig. S1/1** The evolution of  $\Sigma/\Sigma_{t=0}$  in the case of  $\alpha_{\text{mod}} = 0.0001$  and  $p = 0.5$ .

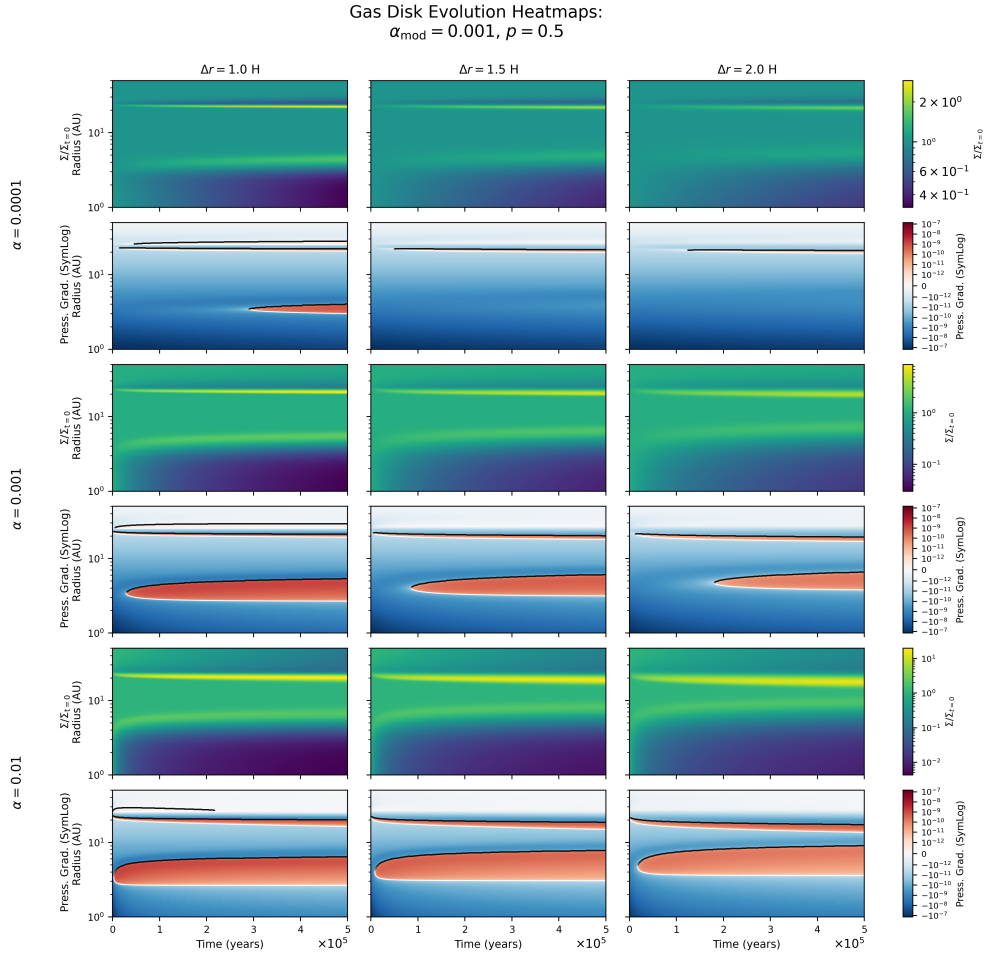

**Fig. S1/2** The evolution of  $\Sigma/\Sigma_{t=0}$  in the case of  $\alpha_{\text{mod}} = 0.001$  and  $p = 0.5$ .

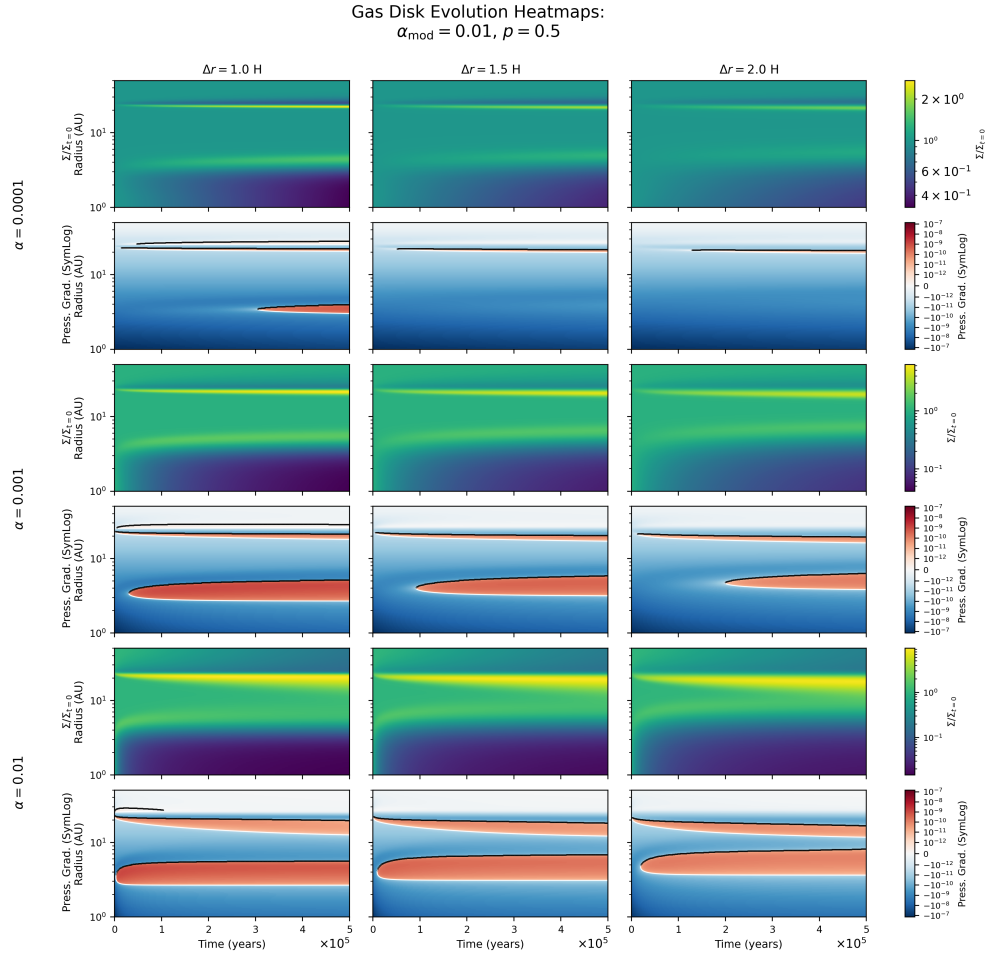

**Fig. S1/3** The evolution of  $\Sigma/\Sigma_{t=0}$  in the case of  $\alpha_{\text{mod}} = 0.01$  and  $p = 0.5$ .

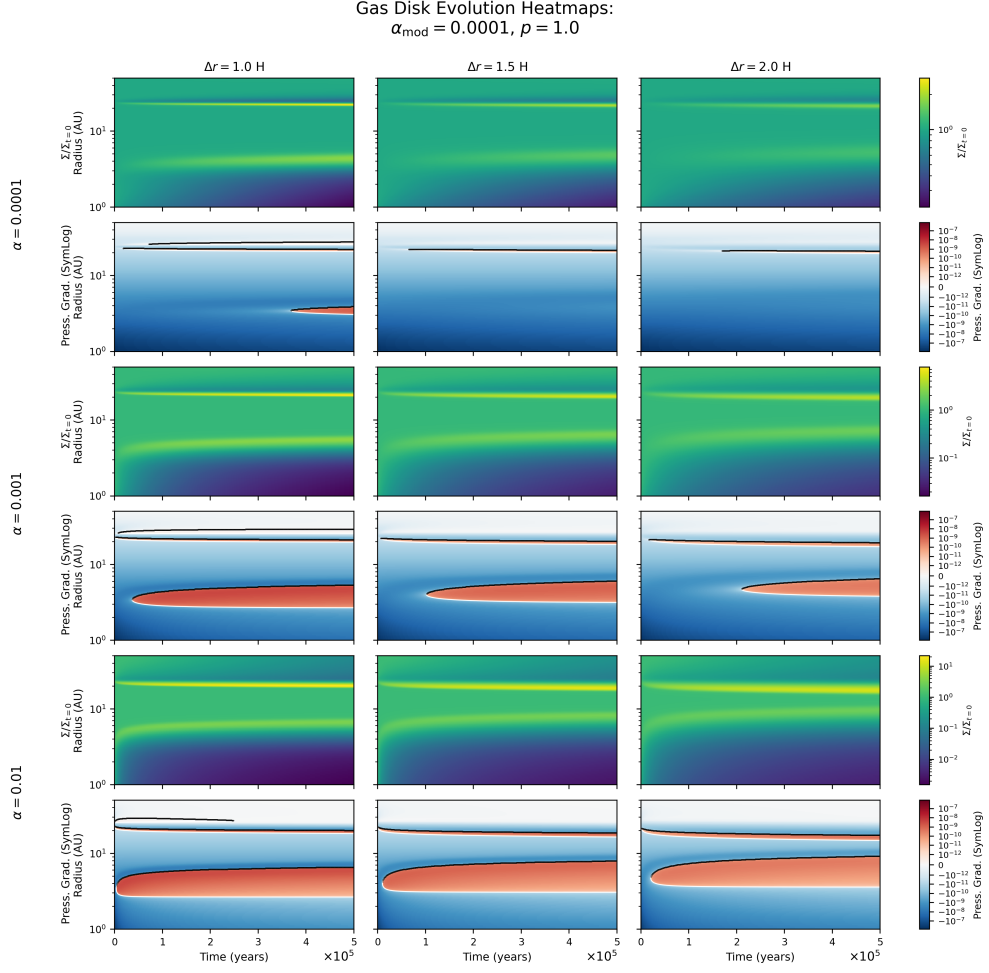

**Fig. S1/4** The evolution of  $\Sigma/\Sigma_{t=0}$  in the case of  $\alpha_{\text{mod}} = 0.0001$  and  $p = 1.0$ .

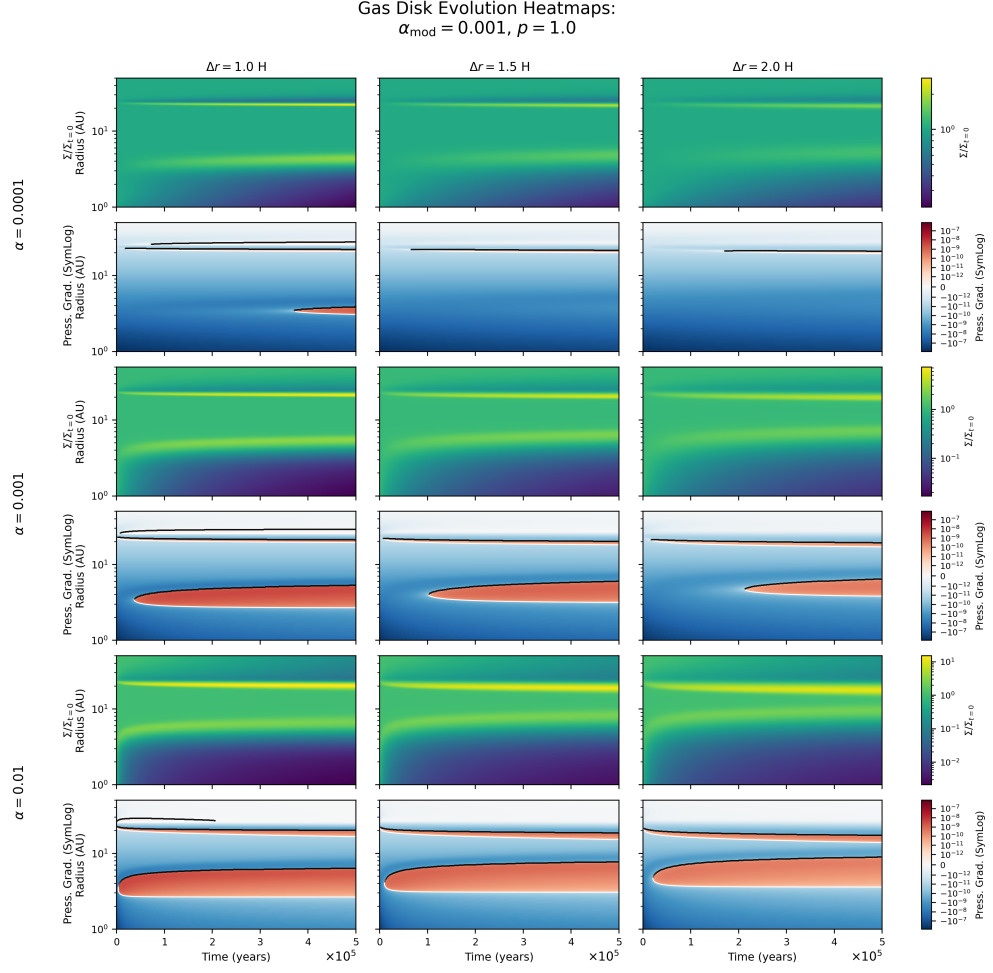

**Fig. S1/5** The evolution of  $\Sigma/\Sigma_{t=0}$  in the case of  $\alpha_{\text{mod}} = 0.001$  and  $p = 1.0$ .

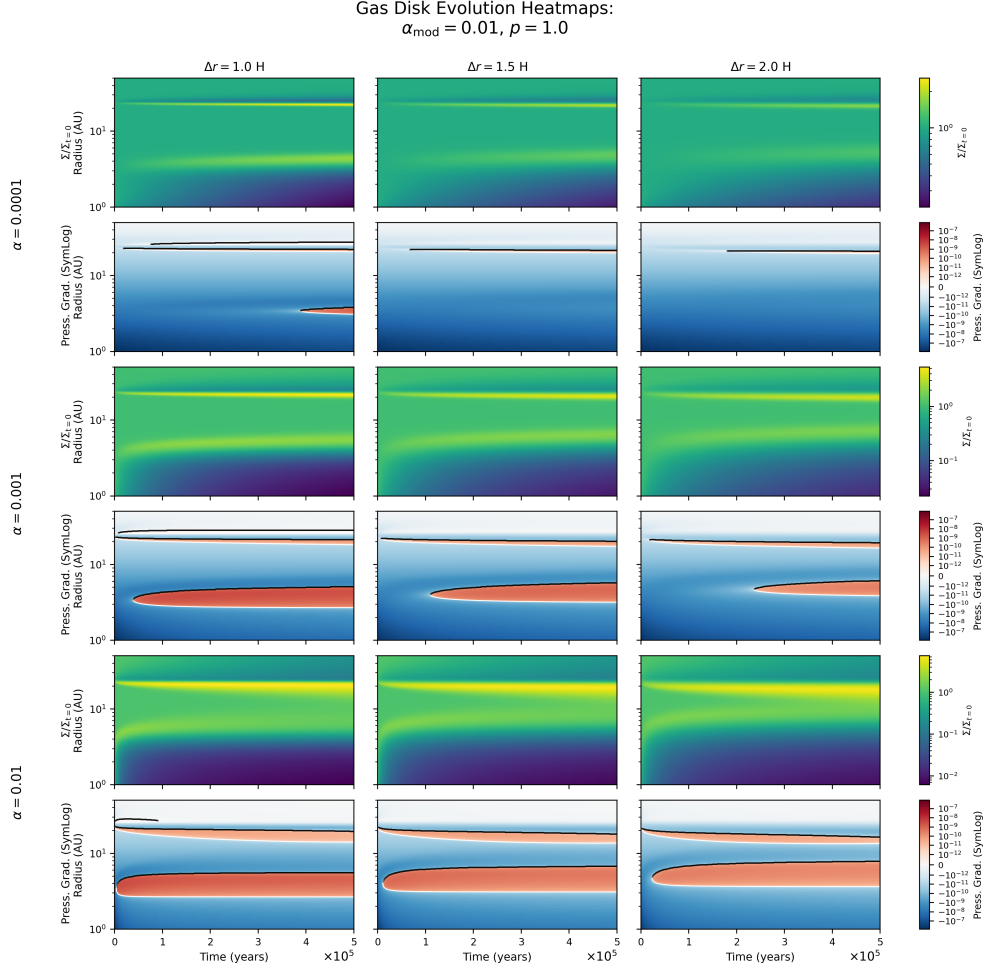

**Fig. S1/6** The evolution of  $\Sigma/\Sigma_{t=0}$  in the case of  $\alpha_{\text{mod}} = 0.01$  and  $p = 1.0$ .

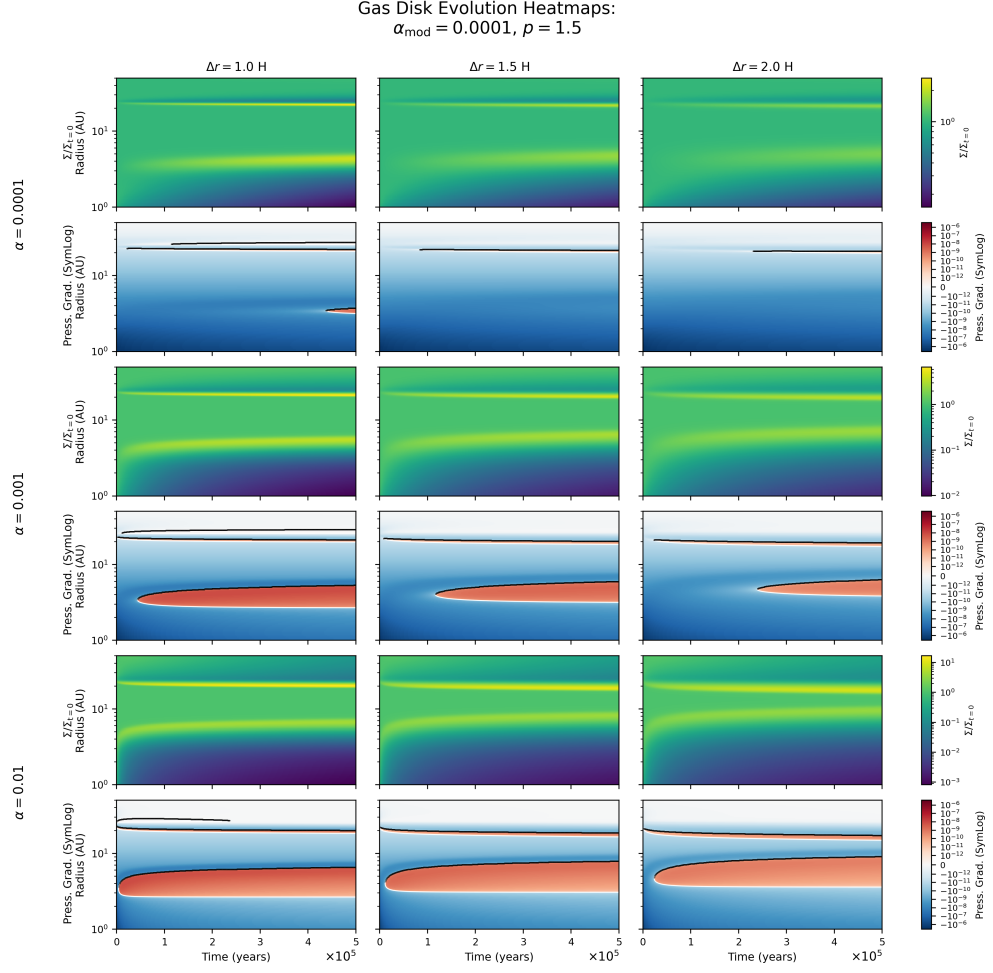

**Fig. S1/7** The evolution of  $\Sigma/\Sigma_{t=0}$  in the case of  $\alpha_{\text{mod}} = 0.0001$  and  $p = 1.5$ .



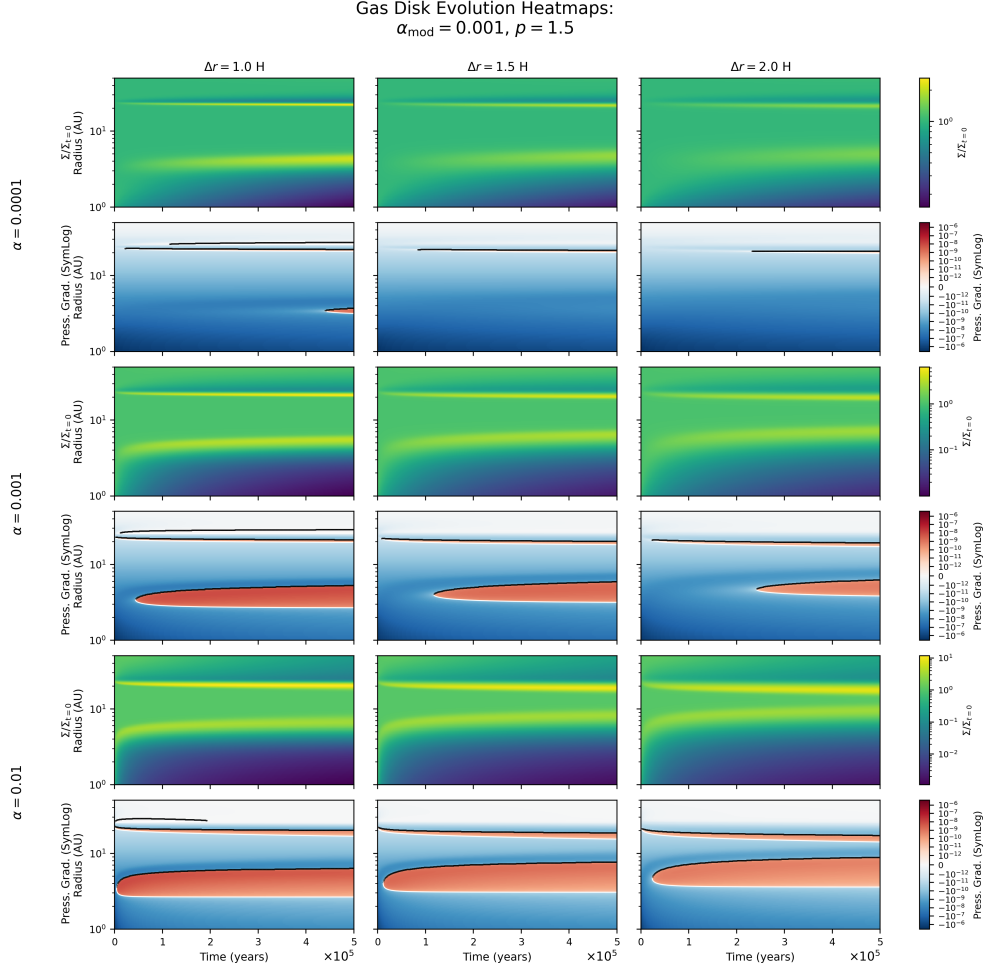

**Fig. S1/8** The evolution of  $\Sigma/\Sigma_{t=0}$  in the case of  $\alpha_{\text{mod}} = 0.001$  and  $p = 1.5$ .

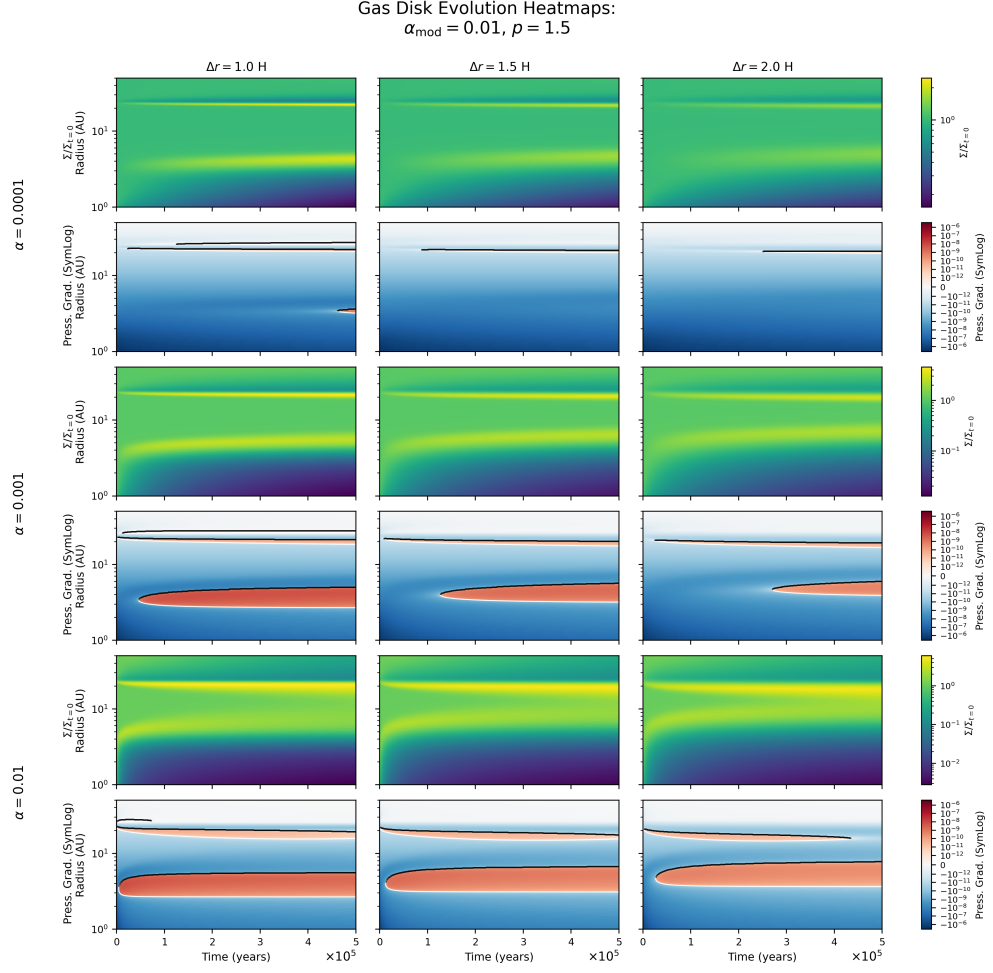

**Fig. S1/9** The evolution of  $\Sigma/\Sigma_{t=0}$  in the case of  $\alpha_{\text{mod}} = 0.01$  and  $p = 1.5$ .
